# Supplementary material for: A myo-inositol dehydrogenase involved in aminocyclitol biosynthesis of hygromycin A
Source: publisher site journal article supplement (doi:10.3762/bjoc.20.51), 2024-03-14
Supplement: Additional file 1 [file 1860-5397-20-51-S1.pdf]

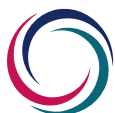

## Supporting Information

for

### **A *myo*-inositol dehydrogenase involved in aminocyclitol biosynthesis of hygromycin A**

Michael O. Akintubosun and Melanie A. Higgins

*Beilstein J. Org. Chem.* **2024**, *20*, 589–596. [doi:10.3762/bjoc.20.51](https://doi.org/10.3762/bjoc.20.51)

## Additional tables and figures

## Table of contents

|           |                                                          |    |
|-----------|----------------------------------------------------------|----|
| Table S1  | Characterized enzymes from PF01408                       | S2 |
| Table S2  | Comparison of the hygromycin A biosynthetic clusters     | S4 |
| Table S3  | Genomic neighborhood analysis of PF01408 sequences       | S5 |
| Figure S1 | Hyg17 Purification                                       | S6 |
| Figure S2 | pH activity profile                                      | S7 |
| Figure S3 | TLC analysis of Hyg17 reaction with <i>myo</i> -inositol | S8 |

**Table S1:** Characterized enzymes from PF01408.

| Gene name                           | Uniprot ID | Function                                                        | Biological role                    | Reference |
|-------------------------------------|------------|-----------------------------------------------------------------|------------------------------------|-----------|
| <b>Inositol metabolism</b>          |            |                                                                 |                                    |           |
| lolG                                | P26935     | <i>Myo</i> -inositol 2-dehydrogenase                            | <i>Myo</i> -inositol catabolism    | [1]       |
|                                     | Q9WYP5     | <i>Myo</i> -inositol 2-dehydrogenase                            | <i>Myo</i> -inositol catabolism    | [2]       |
|                                     | O68965     | <i>Myo</i> -inositol 2-dehydrogenase                            | <i>Myo</i> -inositol catabolism    | [3]       |
|                                     | Q8NTY7     | <i>Myo</i> -inositol 2-dehydrogenase                            | <i>Myo</i> -inositol catabolism    | [4]       |
|                                     | P40332     | <i>Scyllo</i> -inositol 2-dehydrogenase                         | <i>Scyllo</i> -inositol catabolism | [5]       |
|                                     | Q8NNS7     | <i>Scyllo</i> -inositol 2-dehydrogenase                         | <i>Scyllo</i> -inositol catabolism | [4]       |
| lolU                                | O05265     | <i>Scyllo</i> -inositol 2-dehydrogenase                         | <i>Scyllo</i> -inositol catabolism | [6]       |
| lolW                                | O32223     | <i>Scyllo</i> -inositol 2-dehydrogenase                         | <i>Scyllo</i> -inositol catabolism | [6]       |
|                                     | Q8NTY4     | <i>Scyllo</i> -inositol 2-dehydrogenase                         | <i>Scyllo</i> -inositol catabolism | [4]       |
| <b>Natural product biosynthesis</b> |            |                                                                 |                                    |           |
| KijD10                              | B3TMR8     | dTDP-3,4-didehydro-2,6-dideoxy- $\alpha$ -D-glucose 3-reductase | L-Digitoxose biosynthesis          | [7]       |
| SpnN                                | Q9ALN5     | dTDP-3,4-didehydro-2,6-dideoxy- $\alpha$ -D-glucose 3-reductase | Forosamine biosynthesis            | [8]       |
| OleW                                | Q9RR32     | dTDP-3,4-didehydro-2,6-dideoxy- $\alpha$ -D-glucose 3-reductase | L-Oleandrose biosynthesis          | [9]       |
| IgdH                                | F0M433     | Levoglucozan dehydrogenase                                      | Levoglucozan biosynthesis          | [10]      |
| NtdC                                | O07564     | Glucose-6-phosphate 3-dehydrogenase                             | Kanosamine biosynthesis            | [11]      |
| KanD2                               | Q6L737     | Glucose-6-phosphate 3-dehydrogenase                             | Kanosamine biosynthesis            | [12]      |
| RifL                                | Q7BUE1     | UDP-glucose dehydrogenase                                       | Kanosamine biosynthesis            | [13]      |
| Irp3                                | W9BA38     | Thiazolinyil imine reductase                                    | Yersiniabactin biosynthesis        | [14]      |
| <b>Carbohydrate metabolism</b>      |            |                                                                 |                                    |           |
| NagA                                | A4Q8F7     | $\alpha$ -N-Acetylgalactosaminidase                             | Blood group antigen degradation    | [1-5][15] |
|                                     | A4Q8G1     | $\alpha$ -N-Acetylgalactosaminidase                             | Blood group antigen degradation    | [15]      |
|                                     | Q8ECL7     | $\alpha$ -N-Acetylgalactosaminidase                             | Blood group antigen degradation    | [15]      |
| AraA                                | Q53TZ2     | L-arabinose 1-dehydrogenase                                     | L-Arabinose degradation            | [16]      |
| Gal                                 | P11886     | Galactose 1-dehydrogenase                                       | Galactose metabolism               | [17]      |

|                         |            |                                                          |                                          |             |
|-------------------------|------------|----------------------------------------------------------|------------------------------------------|-------------|
| ApsD                    | B1G894     | Apiose dehydrogenase                                     | D-Apiose catabolism                      | [18]        |
|                         | B9JK80     | Apiose dehydrogenase                                     | D-Apiose catabolism                      | [18]        |
| Xdh                     | Q8GAK6     | D-Xylose 1-dehydrogenase                                 | D-Xylose degradation                     | [19]        |
|                         | Q5UY95     | D-Xylose 1-dehydrogenase                                 | D-Xylose catabolism                      | [24–26][20] |
| PLH35                   | T2KNC8     | Oxidoreductase P35                                       | Ulvan degradation                        | [21]        |
| Gfo                     | A0A143PP41 | Aldose-Aldose Oxidoreductase                             | Unknown                                  | [22]        |
| YjhC                    | P39353     | 2,7-anhydro-Neu5Ac dehydrogenase                         | Sialic acid metabolism                   | [23]        |
| YcjS                    | P77503     | Glucoside 3-dehydrogenase                                | Unknown carbohydrate catabolism          | [24]        |
| <b>LPS biosynthesis</b> |            |                                                          |                                          |             |
| WbpB                    | G3XD23     | UDP-N-acetyl-2-amino-2-deoxy-D-glucuronate dehydrogenase | LPS biosynthesis.                        | [25–27]     |
| WlbA                    | I6UWH1     | UDP-N-acetyl-2-amino-2-deoxy-D-glucuronate dehydrogenase | LPS biosynthesis                         | [28]        |
| GnnA                    | A0A543Q2K9 | UDP-N-acetylglucosamine 3-dehydrogenase                  | LPS biosynthesis                         | [29]        |
| <b>Other functions</b>  |            |                                                          |                                          |             |
| PhtC                    | Q05184     | Phthalate cis-4,5-dihydrodiol dehydrogenase              | Cis-3,4-dihydrodiol phthalate catabolism | [30]        |
| DgpA                    | A0A3Q9WWX8 | C and O glycoside isomerase                              | Puerarin catabolism                      | [31]        |
| LigC                    | Q9KWL3     | 4-carboxy-2-hydroxymuconate-6-semialdehyde dehydrogenase | Protocatechuate catabolism               | [32]        |
| Ddh                     | Q5L9Q6     | <i>m</i> -Diaminopimelate dehydrogenase                  | L-Lysine biosynthesis                    | [33]        |

**Table S2:** Comparison of the hygromycin A biosynthetic cluster [34] and unknown hygromycin A-like cluster.

| Protein | Annotated function                        | HygA biosynthetic role | % ID to unknown cluster |
|---------|-------------------------------------------|------------------------|-------------------------|
| Hyg1    | AfsR regulatory protein                   | Regulation             | ---                     |
| Hyg2    | <i>p</i> -Hydroxybenzoate hydroxylase     | Cinnamic acid          | ---                     |
| Hyg3    | Regulatory protein                        | Regulation             | ---                     |
| Hyg4    | Chorismate lyase                          | Cinnamic acid          | ---                     |
| Hyg5    | Mannose dehydratase                       | Furanose               | ---                     |
| Hyg6    | Methyltransferase                         | Aminocyclitol          | 56                      |
| Hyg7    | Unknown                                   | Aminocyclitol          | 69                      |
| Hyg8    | Aminotransferase                          | Aminocyclitol          | 65                      |
| Hyg9    | ACP                                       | Cinnamic acid          | 31                      |
| Hyg10   | b-ketoacyl synthase I                     | Cinnamic acid          | 50                      |
| Hyg11   | Unknown                                   | Unknown                | ---                     |
| Hyg12   | CoA-ligase                                | Cinnamic acid          | 37                      |
| Hyg13   | ACP                                       | Cinnamic acid          |                         |
| Hyg14   | 3-Hydroxyacyl ACP dehydratase             | Cinnamic acid          | 34                      |
| Hyg15   | 3-Hydroxyacyl ACP reductase               | Cinnamic acid          | 44                      |
| Hyg16   | Glycosyltransferase                       | Furanose attachment    | 45                      |
| Hyg17   | <i>Myo</i> -inositol dehydrogenase        | Aminocyclitol          | 50                      |
| Hyg18   | <i>Myo</i> -inositol-1-phosphate synthase | Aminocyclitol          | ---                     |
| Hyg19   | Transmembrane protein                     | Unknown                | ---                     |
| Hyg20   | Transglucosylase                          | Furanose               | 57                      |
| Hyg21   | Phosphotransferase                        | Resistance             | 37                      |
| Hyg22   | Acyltransferase                           | Cinnamic acid          | ---                     |
| Hyg23   | Fucose synthase                           | Furanose               | 32                      |
| Hyg24   | Unknown                                   | Unknown                |                         |
| Hyg25   | <i>Myo</i> -inositol-1-phosphatase        | Aminocyclitol          | ---                     |
| Hyg26   | Short chain dehydrogenase                 | Furanose               | ---                     |
| Hyg27   | DAHPS synthase                            | Cinnamic acid          | ---                     |
| Hyg28   | ABC transporter                           | Unknown                | ---                     |
| Hyg29   | Methyltransferase                         | Unknown                | ---                     |

**Table S3:** Genomic neighborhood analysis of PF01408 sequences.

| <b>PFAM</b>         | <b>Function</b>                                                 | <b># Sequences with PFAM neighbors</b> | <b># SSN clusters that contain PFAM</b> |
|---------------------|-----------------------------------------------------------------|----------------------------------------|-----------------------------------------|
|                     | <b>NP biosynthetic enzymes</b>                                  |                                        |                                         |
| PF00109             | Ketoacyl synthase                                               | 584                                    | 45                                      |
| PF00550             | Acyl carrier protein (ACP) domain                               | 340                                    | 71                                      |
| PF00975             | Thioesterase (TE) domain*                                       | 1,193                                  | 22                                      |
|                     | <b>Aminotransferases</b>                                        |                                        |                                         |
| PF01041             | DegT/DnrJ/EryCq/StrS aminotransferase                           | 15,139                                 | 340                                     |
| PF00202             | Aminotransferase – class III                                    | 1,236                                  | 149                                     |
| PF00155             | Aminotransferase – class I and II                               | 1,318                                  | 136                                     |
|                     | <b>Putative resistance proteins</b>                             |                                        |                                         |
| PF04655             | Aminoglycoside antibiotic resistance kinase                     | 22                                     | 4                                       |
| PF02537             | CrcB-like protein, Camphor Resistance                           | 81                                     | 5                                       |
| PF00903/<br>PF13660 | Glyoxalase/Bleomycin resistance protein/Dioxygenase superfamily | 1354                                   | 160                                     |
| PF13536             | Putative multidrug resistance efflux protein                    | 2                                      | 2                                       |
| PF05099             | Tellurite resistance protein TerB                               | 8                                      | 5                                       |

\*TE domains only on their own. Some other TE domains are also found with ACP domains.

**Figure S1:** SDS-PAGE gel of purified Hyg17.

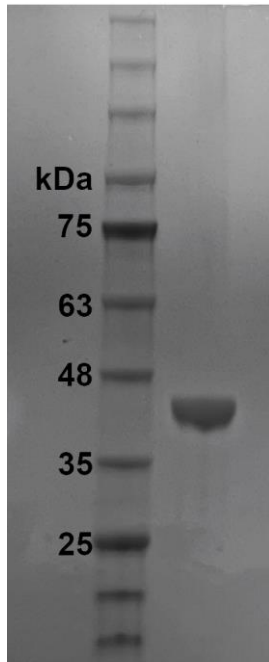

**Expected MW**  
**36 kDa**

**Figure S2:** pH Activity profile for reactions with 10 mM *myo*-inositol, 10 mM NAD<sup>+</sup>, 1 μM Hyg17, 100 mM HEPEs, 100 mM Tris, 100 mM CHES, and 100 mM CAPS, 50 mM NaCl, pH 9.5–11.

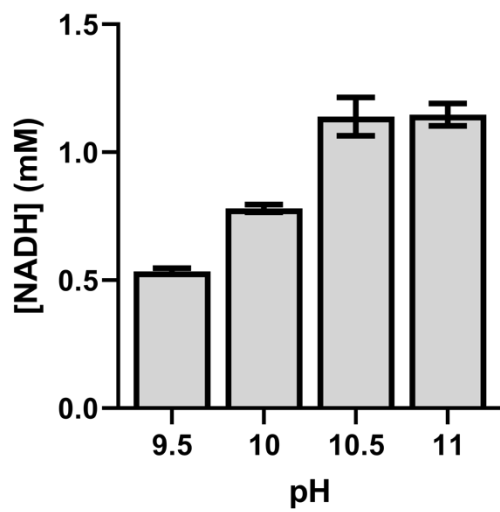



**Figure S3:** TLC analysis for Hyg17 and BslDH reactions with *myo*-inositol and NAD<sup>+</sup>. *p*-Anisaldehyde was used to stain ketones light pink.

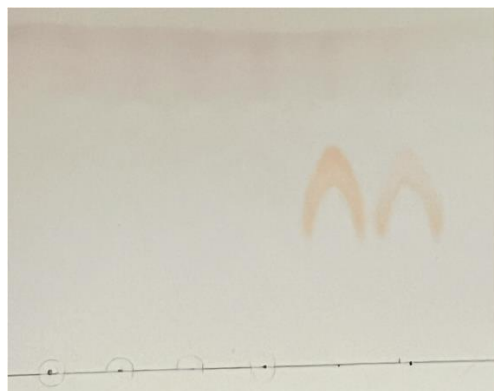

|   |   |   |   |   |   |                      |
|---|---|---|---|---|---|----------------------|
| - | + | - | + | + | + | NAD <sup>+</sup>     |
| - | - | + | + | + | + | <i>myo</i> -inositol |
| - | - | - | - | + | - | Hyg17                |
| - | - | - | - | - | + | BslDH                |

## References:

1. Ramaley, R.; Fujita, Y.; Freese, E. *J Biol Chem*, **1979**, *254*, 7684–7690
2. Rodionova, I. A.; Leyn, S. A.; Burkart, M. D.; Boucher, N.; Noll, K. M.; Osterman, A. L.; Rodionov, D. A. *Environ Microbiol* **2013**, *15*, 2254–2266.
3. Galbraith, M. P.; Feng, S. F.; Borneman, J.; Triplett, E. W.; De Bruijn, F. J.; Rossbachl, S. *Microbiology*, **1998**, *144*, 2915–2924.
4. Ramp, P.; Pflieger, C.; Dittrich, J.; Mack, C.; Gohlke, H.; Bott, M. *Microbiol Spectr* **2022**, *10*, e01950-22.
5. Morinaga, T.; Ashida, H.; Yoshida, K. *Microbiology*, **2010**, *156*, 1538–1546.
6. Kang, D.-M.; Tanaka, K.; Takenaka, S.; Ishikawa, S.; Yoshida, K. *Bioscience, Biotechnology, and Biochemistry*, **2017**, *81*, 1026–1032.
7. Kubiak, R. L.; Holden, H. M. *Biochemistry*, **2011**, *50*, 5905–5917.
8. Waldron, C.; Matsushima, P.; Rosteck, P. R.; Broughton, M. C.; Turner, J.; Madduri, K.; Crawford, K. P.; Merlo, D. J.; Baltz, R. H. *Chemistry & Biology*, **2001**, *8*, 487–499.
9. Aguirrezabalaga, I.; Olano, C.; Allende, N.; Rodriguez, L.; Braña, A. F.; Méndez, C.; Salas, J. A. *Antimicrob Agents Chemother*, **2000**, *44*, 1266–1275.
10. Sugiura, M.; Nakahara, M.; Yamada, C.; Arakawa, T.; Kitaoka, M.; Fushinobu, S. *Journal of Biological Chemistry*, **2018**, *293*, 17375–17386.
11. Vetter, N. D.; Langill, D. M.; Anjum, S.; Boisvert-Martel, J.; Jagdhane, R. C.; Omene, E.; Zheng, H.; Van Straaten, K. E.; Asiamah, I.; Krol, E. S.; Sanders, D. A. R.; Palmer, D. R. J. *J. Am. Chem. Soc.*, **2013**, *135*, 5970–5973.
12. Kudo, F.; Kitayama, Y.; Miyanaga, A.; Hirayama, A.; Eguchi, T. *Biochemistry*, **2020**, *59*, 1470–1473.
13. Yu, T.-W.; Müller, R.; Müller, M.; Zhang, X.; Draeger, G.; Kim, C.-G.; Leistner, E.; Floss, H. G. *Journal of Biological Chemistry*, **2001**, *276*, 12546–12555.
14. Meneely, K. M.; Lamb, A. L. *Biochemistry*, **2012**, *51*, 9002–9013.
15. Liu, Q. P.; Sulzenbacher, G.; Yuan, H.; Bennett, E. P.; Pietz, G.; Saunders, K.; Spence, J.; Nudelman, E.; Levery, S. B.; White, T.; Neveu, J. M.; Lane, W. S.; Bourne, Y.; Olsson, M. L.; Henrissat, B.; Clausen, H. *Nat Biotechnol*, **2007**, *25*, 454–464.
16. Watanabe, S.; Kodak, T.; Makino, K. *Journal of Biological Chemistry*, **2006**, *281*, 2612–2623.
17. Blachnitzky, E.; Wengenmayer, F.; Kurz, G. *European Journal of Biochemistry*, **1974**, *47*, 235–250.
18. Carter, M. S.; Zhang, X.; Huang, H.; Bouvier, J. T.; Francisco, B. S.; Vetting, M. W.; Al-Obaidi, N.; Bonanno, J. B.; Ghosh, A.; Zallot, R. G.; Andersen, H. M.; Almo, S. C.; Gerlt, J. A. *Nat Chem Biol*, **2018**, *14*, 696–705.
19. Mihasan, M.; Stefan, M.; Hritcu, L.; Artenie, V.; Brandsch, R. *Research in Microbiology*, **2013**, *164*, 22–30.
20. Johnsen, U.; Schönheit, P. *J Bacteriol*, **2004**, *186*, 6198–6207.
21. Baumgen, M.; Dutschei, T.; Bartosik, D.; Suster, C.; Reisky, L.; Gerlach, N.; Stanetty, C.; Mihovilovic, M. D.; Schweder, T.; Hehemann, J.-H.; Bornscheuer, U. T. *Journal of Biological Chemistry*, **2021**, 101210.

22. Taberman, H.; Andberg, M.; Koivula, A.; Hakulinen, N.; Penttilä, M.; Rouvinen, J.; Parkkinen, T. *Biochemical Journal*, **2015**, *472*, 297–307.
23. Horne, C. R.; Kind, L.; Davies, J. S.; Dobson, R. C. J. *Proteins* **2020**, *88*, 654–668.
24. Mukherjee, K.; Huddleston, J. P.; Narindoshvili, T.; Nemmara, V. V.; Raushel, F. M. *Biochemistry*, **2019**, *58*, 1388–1399.
25. Westman, E. L.; Preston, A.; Field, R. A.; Lam, J. S. *J Bacteriol*, **2008**, *190*, 6060–6069.
26. Westman, E. L.; McNally, D. J.; Charchoglyan, A.; Brewer, D.; Field, R. A.; Lam, J. S. *Journal of Biological Chemistry*, **2009**, *284*, 11854–11862.
27. Larkin, A.; Imperiali, B. *Biochemistry*, **2009**, *48*, 5446–5455. doi:10.1021/bi900186u
28. Thoden, J. B.; Holden, H. M. *Biochemistry*, **2010**, *49*, 7939–7948.
29. Manissorn, J.; Sitthiyotha, T.; Montalban, J. R. E.; Chunsrivirod, S.; Thongnuek, P.; Wangkanont, K. *ACS Chem. Biol.*, **2020**, *15*, 3235–3243.
30. Mahto, J. K.; Sharma, M.; Neetu, N.; Kayastha, A.; Aggarwal, S.; Kumar, P. *Archives of Biochemistry and Biophysics*, **2022**, *727*, 109314.
31. He, P.; Wang, S.; Li, S.; Liu, S.; Zhou, S.; Wang, J.; Tao, J.; Wang, D.; Wang, R.; Ma, W. *Acta Pharmaceutica Sinica B*, **2023**, *13*, 246–255.
32. Masai, E.; Momose, K.; Hara, H.; Nishikawa, S.; Katayama, Y.; Fukuda, M. *J Bacteriol*, **2000**, *182*, 6651–6658.
33. Hudson, A. O.; Klartag, A.; Gilvarg, C.; Dobson, R. C. J.; Marques, F. G.; Leustek, T. *Biochimica et Biophysica Acta (BBA) - Proteins and Proteomics*, **2011**, *1814*, 1162–1168.
34. Palaniappan, N.; Ayers, S.; Gupta, S.; Habib, E.-S.; Reynolds, K. A. *Chemistry & Biology*, **2006**, *13*, 753–764.
